# Supplementary material
Source: PubMed Central journal article supplement (PMC3059045)
Supplement: supp_M110.186833_jbc.M110.186833-1.pdf [file supp_M110.186833_jbc.M110.186833-1.pdf]

Supplemental data

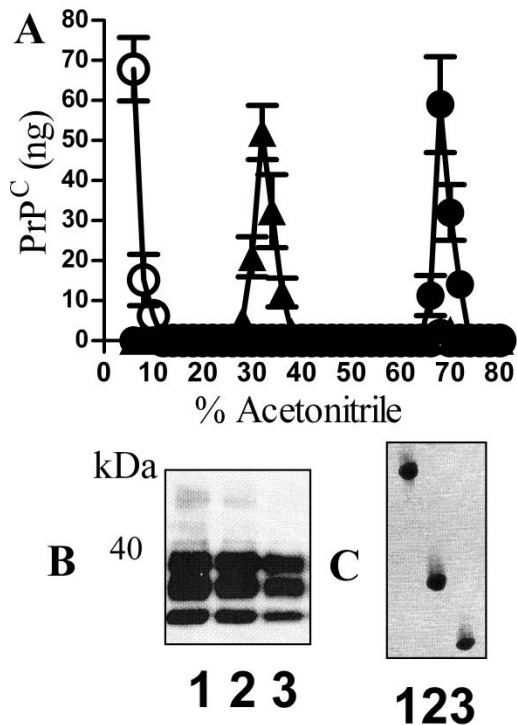

**Supplemental Figure 1 - Phospholipase digestion alters the GPI anchor attached to PrP<sup>C</sup>.** (A) PrP<sup>C</sup> preparations that had been mock-treated (PrP<sup>C</sup>-GPI (●)), digested with PLA<sub>2</sub> (PrP<sup>C</sup>-G-lyso-PI (▲)) or digested with PI-PLC (PrP<sup>C</sup>-IPG (○)) were loaded onto C18 columns and eluted by reverse phase chromatography using a gradient of acetonitrile and water. The amount of PrP<sup>C</sup> in each fraction was measured by ELISA. Values shown are the mean amount of PrP<sup>C</sup> ± SD from duplicate experiments performed 4 times (n=8). (B) PrP<sup>C</sup> preparations that had been mock-treated (1), digested with PLA<sub>2</sub> (2) or digested with PI-PLC (3) were analysed by PAGE and immunoblot using mAb ICSM18. (C) GPI anchors isolated from PrP<sup>C</sup> that had been mock-treated (1), digested with PLA<sub>2</sub> (2) or digested with PI-PLC (3) were separated on silica 60 plates and identified with a mAb to phosphatidylinositol.
